# Supplementary material
Source: publisher figshare collection journal article supplement (https://karger.figshare.com/ndownloader/files/13175186)
Supplement: Supplementary file 1 [file 13175186]

| **Appendix. Risky drinking impact stratified by socioeconomic area and cigarette smoking interaction. Sensitivity analyses** | | | | | | | | | | | |
| --- | --- | --- | --- | --- | --- | --- | --- | --- | --- | --- | --- |
| **Females** |  |  |  |  |  | **Males** |  |  |  |  |  |
| **variable** | **OR** | **lower** | **upper** | **p-value** |  | **variable** | **OR** | **lower** | **upper** | **p-value** |
| **Primary health care** | |  |  |  |  | **Primary health care** | |  |  |  |  |
| **SES** |  |  |  |  |  | **SES** |  |  |  |  |  |
| High | (Intercept) | 11,83 | 9,10 | 15,39 | 0,00001* | high | (Intercept) | 7,86 | 6,93 | 8,91 | 0,00001* |
| **(N = 61,013)** | agez | 2,09 | 2,03 | 2,14 | 0,00001* | **(N = 106,441)** | agez | 2,51 | 2,45 | 2,56 | 0,00001* |
|  | high risk | 0,88 | 0,74 | 1,05 | 0,16684 |  | high risk | 0,92 | 0,83 | 1,03 | 0,13569 |
| high risk:former smoker | 1,30 | 0,87 | 1,95 | 0,20189 |  | high risk:former smoker | 0,96 | 0,80 | 1,15 | 0,65895 |
| high risk:currentsmoker | 1,31 | 1,03 | 1,66 | 0,02708 |  | high risk:currentsmoker | 1,07 | 0,93 | 1,22 | 0,33240 |
|  | former smoker | 1,23 | 1,13 | 1,34 | 0,00001* |  | former smoker | 1,59 | 1,50 | 1,69 | 0,00001* |
| currentsmoker | 0,94 | 0,88 | 1,00 | 0,03670 |  | currentsmoker | 1,02 | 0,98 | 1,07 | 0,37357 |
| low | (Intercept) | 17,21 | 14,87 | 19,90 | 0,00001* | Low | (Intercept) | 10,31 | 9,36 | 11,36 | 0,00001* |
| **(N = 51,696)** | agez | 2,05 | 1,98 | 2,13 | 0,00001* | **(N = 130,995)** | agez | 2,54 | 2,49 | 2,60 | 0,00001* |
| high risk | 0,95 | 0,78 | 1,15 | 0,57540 |  | high risk | 0,91 | 0,83 | 0,99 | 0,03429 |
|  | high risk:former smoker | 1,02 | 0,65 | 1,59 | 0,94664 |  | high risk:former smoker | 0,94 | 0,81 | 1,10 | 0,45589 |
|  | high risk:currentsmoker | 0,97 | 0,76 | 1,25 | 0,82188 |  | high risk:currentsmoker | 0,95 | 0,85 | 1,06 | 0,32894 |
|  | former smoker | 1,14 | 1,02 | 1,27 | 0,02075 |  | former smoker | 1,54 | 1,46 | 1,63 | 0,00001* |
|  | currentsmoker | 0,93 | 0,87 | 1,01 | 0,07095 |  | currentsmoker | 0,98 | 0,94 | 1,03 | 0,44800 |
| moderate | (Intercept) | 13,92 | 12,76 | 15,20 | 0,00001* | Moderate | (Intercept) | 8,93 | 8,45 | 9,44 | 0,00001* |
| **(N = 81,856)** | agez | 2,08 | 2,03 | 2,14 | 0,00001* | **(N = 174,946)** | agez | 2,49 | 2,45 | 2,53 | 0,00001* |
|  | high risk | 0,98 | 0,83 | 1,17 | 0,82592 |  | high risk | 0,89 | 0,81 | 0,96 | 0,00548 |
|  | high risk:former smoker | 0,93 | 0,64 | 1,34 | 0,69679 |  | high risk:former smoker | 0,93 | 0,81 | 1,08 | 0,35059 |
|  | high risk:currentsmoker | 0,99 | 0,79 | 1,24 | 0,95393 |  | high risk:currentsmoker | 1,01 | 0,91 | 1,12 | 0,83735 |
|  | former smoker | 1,15 | 1,06 | 1,25 | 0,00057 |  | former smoker | 1,61 | 1,53 | 1,68 | 0,00001* |
|  | currentsmoker | 0,93 | 0,88 | 0,98 | 0,00878 |  | currentsmoker | 1,00 | 0,96 | 1,03 | 0,89771 |
| **Hospital inpatient admission** | |  |  |  |  | **Hospital inpatient admission** | |  |  |  |  |
| high | (Intercept) | 0,05 | 0,04 | 0,06 | 0,00001* | high | (Intercept) | 0,04 | 0,04 | 0,05 | 0,00001* |
| **(N = 60,952)** | agez | 1,51 | 1,45 | 1,58 | 0,00001* | **(N = 106,298)** | agez | 2,36 | 2,29 | 2,44 | 0,00001* |
|  | high risk | 1,17 | 0,92 | 1,49 | 0,19472 |  | high risk | 1,14 | 0,98 | 1,33 | 0,08355 |
|  | high risk:former smoker | 0,75 | 0,44 | 1,28 | 0,29072 |  | high risk:former smoker | 1,22 | 1,01 | 1,48 | 0,04321 |
|  | high risk:currentsmoker | 1,15 | 0,82 | 1,62 | 0,42427 |  | high risk:currentsmoker | 1,16 | 0,96 | 1,41 | 0,11410 |
|  | former smoker | 1,18 | 1,05 | 1,32 | 0,00398 |  | former smoker | 1,36 | 1,29 | 1,45 | 0,00001* |
|  | currentsmoker | 1,15 | 1,04 | 1,27 | 0,00780 |  | currentsmoker | 1,55 | 1,45 | 1,66 | 0,00001* |
| low | (Intercept) | 0,06 | 0,06 | 0,07 | 0,00001* | low | (Intercept) | 0,05 | 0,05 | 0,05 | 0,00001* |
| **(N = 51,648)** | agez | 1,39 | 1,33 | 1,44 | 0,00001* | **(N = 130,799)** | agez | 2,37 | 2,31 | 2,44 | 0,00001* |
|  | high risk | 0,98 | 0,79 | 1,21 | 0,85344 |  | high risk | 1,01 | 0,90 | 1,14 | 0,84919 |
|  | high risk:former smoker | 1,16 | 0,73 | 1,84 | 0,52587 |  | high risk:former smoker | 1,19 | 1,02 | 1,38 | 0,02600 |
|  | high risk:currentsmoker | 1,23 | 0,91 | 1,66 | 0,18131 |  | **high risk:currentsmoker** | 1,37 | 1,19 | 1,58 | 0,00002* |
|  | former smoker | 1,16 | 1,03 | 1,30 | 0,01665 |  | former smoker | 1,39 | 1,32 | 1,46 | 0,00001* |
|  | currentsmoker | 1,08 | 0,98 | 1,20 | 0,10966 |  | currentsmoker | 1,50 | 1,42 | 1,60 | 0,00001* |
| moderate | (Intercept) | 0,06 | 0,06 | 0,06 | 0,00001* | Moderate | (Intercept) | 0,05 | 0,05 | 0,05 | 0,00001* |
| **(N = 81,789)** | agez | 1,45 | 1,41 | 1,50 | 0,00001* | **(N = 174,731)** | agez | 2,30 | 2,25 | 2,36 | 0,00001* |
|  | high risk | 1,22 | 1,02 | 1,46 | 0,03179 |  | high risk | 1,19 | 1,07 | 1,32 | 0,00134 |
|  | high risk:former smoker | 1,13 | 0,76 | 1,68 | 0,53205 |  | high risk:former smoker | 0,85 | 0,74 | 0,98 | 0,02634 |
|  | high risk:currentsmoker | 1,02 | 0,78 | 1,34 | 0,86423 |  | high risk:currentsmoker | 1,09 | 0,95 | 1,25 | 0,20781 |
|  | former smoker | 1,06 | 0,97 | 1,17 | 0,20982 |  | former smoker | 1,44 | 1,38 | 1,51 | 0,00001* |
|  | currentsmoker | 1,16 | 1,07 | 1,26 | 0,00030 |  | currentsmoker | 1,52 | 1,44 | 1,60 | 0,00001* |
| **Alcohol admission** | |  |  |  |  | **Alcohol admission** | |  |  |  |  |
| high | (Intercept) | 0,01 | 0,01 | 0,01 | 0,00001* | high | (Intercept) | 0,01 | 0,01 | 0,02 | 0,00001* |
| **(N = 61,013)** | agez | 2,60 | 2,40 | 2,83 | 0,00001* | **(N = 106,441)** | agez | 2,36 | 2,24 | 2,48 | 0,00001* |
|  | high risk | 1,43 | 0,98 | 2,10 | 0,06436 |  | high risk | 1,36 | 1,07 | 1,71 | 0,01080 |
|  | high risk:former smoker | 0,80 | 0,34 | 1,90 | 0,61436 |  | high risk:former smoker | 1,15 | 0,85 | 1,54 | 0,36778 |
|  | high risk:currentsmoker | 1,56 | 0,89 | 2,74 | 0,12285 |  | high risk:currentsmoker | 1,17 | 0,88 | 1,56 | 0,27400 |
|  | former smoker | 1,27 | 1,04 | 1,55 | 0,01913 |  | former smoker | 1,37 | 1,24 | 1,51 | 0,00001* |
|  | currentsmoker | 1,23 | 1,00 | 1,50 | 0,04809 |  | currentsmoker | 1,67 | 1,50 | 1,87 | 0,00001* |
| low | (Intercept) | 0,01 | 0,01 | 0,01 | 0,00001* | low | (Intercept) | 0,02 | 0,02 | 0,02 | 0,00001* |
| **(N = 51,696)** | agez | 2,47 | 2,27 | 2,69 | 0,00001* | **(N = 130,995)** | agez | 2,30 | 2,21 | 2,40 | 0,00001* |
|  | high risk | 1,26 | 0,89 | 1,78 | 0,18634 |  | high risk | 1,13 | 0,94 | 1,36 | 0,18166 |
|  | high risk:former smoker | 0,75 | 0,28 | 1,97 | 0,55381 |  | high risk:former smoker | 1,04 | 0,82 | 1,32 | 0,74944 |
|  | high risk:currentsmoker | 1,90 | 1,16 | 3,13 | 0,01114 |  | high risk:currentsmoker | 1,37 | 1,09 | 1,72 | 0,00611 |
|  | former smoker | 1,13 | 0,89 | 1,44 | 0,29918 |  | former smoker | 1,33 | 1,23 | 1,45 | 0,00001* |
|  | currentsmoker | 1,21 | 0,98 | 1,49 | 0,07745 |  | currentsmoker | 1,46 | 1,33 | 1,61 | 0,00001* |
| Moderate | (Intercept) | 0,01 | 0,01 | 0,01 | 0,00001* | moderate | (Intercept) | 0,02 | 0,02 | 0,02 | 0,00001* |
| **(N = 81,856)** | agez | 2,44 | 2,28 | 2,60 | 0,00001* | **(N = 174,946)** | agez | 2,33 | 2,24 | 2,41 | 0,00001* |
|  | high risk | 1,53 | 1,16 | 2,02 | 0,00243 |  | high risk | 1,23 | 1,04 | 1,46 | 0,01400 |
|  | high risk:former smoker | 1,00 | 0,49 | 2,03 | 0,99248 |  | high risk:former smoker | 0,88 | 0,70 | 1,10 | 0,26102 |
|  | high risk:currentsmoker | 1,37 | 0,89 | 2,11 | 0,14936 |  | high risk:currentsmoker | 1,26 | 1,02 | 1,55 | 0,02876 |
|  | former smoker | 1,02 | 0,84 | 1,23 | 0,83774 |  | former smoker | 1,33 | 1,24 | 1,43 | 0,00001* |
|  | currentsmoker | 1,31 | 1,12 | 1,55 | 0,00107 |  | currentsmoker | 1,47 | 1,35 | 1,60 | 0,00001* |
| **Outpatient specialized visit** | |  |  |  |  | **Outpatient specialized visit** | |  |  |  |  |
| High | (Intercept) | 0,94 | 0,79 | 1,11 | 0,43272 | high | (Intercept) | 0,85 | 0,80 | 0,91 | 0,00001* |
| **(N = 60,952)** | agez | 1,47 | 1,44 | 1,50 | 0,00001* | **(N = 106,298)** | agez | 1,78 | 1,76 | 1,81 | 0,00001* |
|  | high risk | 0,97 | 0,86 | 1,09 | 0,58733 |  | high risk | 1,03 | 0,95 | 1,11 | 0,48997 |
|  | high risk:former smoker | 0,68 | 0,54 | 0,86 | 0,00146 |  | high risk:former smoker | 0,99 | 0,89 | 1,11 | 0,86060 |
|  | high risk:currentsmoker | 1,12 | 0,95 | 1,33 | 0,16316 |  | high risk:currentsmoker | 0,97 | 0,88 | 1,07 | 0,50247 |
|  | former smoker | 1,24 | 1,18 | 1,31 | 0,00001* |  | former smoker | 1,39 | 1,34 | 1,43 | 0,00001* |
|  | currentsmoker | 0,98 | 0,94 | 1,02 | 0,34827 |  | currentsmoker | 1,07 | 1,04 | 1,11 | 0,00003* |
| Low | (Intercept) | 1,23 | 1,14 | 1,34 | 0,00001* | low | (Intercept) | 0,97 | 0,84 | 1,12 | 0,64388 |
| **(N = 51,648)** | agez | 1,60 | 1,57 | 1,63 | 0,00001* | **(N = 130,799)** | agez | 2,03 | 2,00 | 2,06 | 0,00001* |
|  | high risk | 0,93 | 0,83 | 1,03 | 0,16364 |  | high risk | 0,92 | 0,86 | 0,98 | 0,00739 |
|  | high risk:former smoker | 0,98 | 0,77 | 1,25 | 0,85932 |  | high risk:former smoker | 1,04 | 0,95 | 1,14 | 0,38140 |
|  | high risk:currentsmoker | 1,02 | 0,88 | 1,19 | 0,76606 |  | high risk:currentsmoker | 1,07 | 0,99 | 1,15 | 0,09980 |
|  | former smoker | 1,14 | 1,07 | 1,21 | 0,00002* |  | former smoker | 1,33 | 1,29 | 1,38 | 0,00001* |
|  | currentsmoker | 0,97 | 0,93 | 1,02 | 0,24078 |  | currentsmoker | 1,00 | 0,97 | 1,04 | 0,75908 |
| Moderate | (Intercept) | 1,10 | 1,04 | 1,16 | 0,00038 | moderate | (Intercept) | 0,95 | 0,88 | 1,03 | 0,23555 |
| **(N = 81,789)** | agez | 1,52 | 1,50 | 1,55 | 0,00001* | **(N = 174,731)** | agez | 1,95 | 1,93 | 1,97 | 0,00001* |
|  | high risk | 0,99 | 0,90 | 1,10 | 0,91724 |  | high risk | 0,95 | 0,90 | 1,01 | 0,07615 |
|  | high risk:former smoker | 1,01 | 0,82 | 1,25 | 0,94314 |  | high risk:former smoker | 1,00 | 0,92 | 1,08 | 0,93437 |
|  | high risk:currentsmoker | 1,08 | 0,94 | 1,24 | 0,27150 |  | high risk:currentsmoker | 1,04 | 0,97 | 1,12 | 0,25600 |
|  | former smoker | 1,17 | 1,12 | 1,23 | 0,00001* |  | former smoker | 1,35 | 1,32 | 1,39 | 0,00001* |
|  | currentsmoker | 1,02 | 0,98 | 1,05 | 0,41791 |  | currentsmoker | 1,02 | 0,99 | 1,05 | 0,17978 |
| **Emergency department** | |  |  |  |  | **Emergency department** | |  |  |  |  |
| high | (Intercept) | 0,32 | 0,30 | 0,34 | 0,00001* | high | (Intercept) | 0,30 | 0,27 | 0,33 | 0,00001* |
| **(N = 60,952)** | agez | 0,98 | 0,96 | 1,00 | 0,04980 | **(N = 106,298)** | agez | 1,11 | 1,09 | 1,13 | 0,00001* |
|  | high risk | 1,17 | 1,03 | 1,32 | 0,01724 |  | high risk | 1,18 | 1,09 | 1,29 | 0,00009* |
|  | high risk:former smoker | 0,80 | 0,62 | 1,04 | 0,10220 |  | high risk:former smoker | 0,97 | 0,86 | 1,09 | 0,61941 |
|  | high risk:currentsmoker | 1,10 | 0,93 | 1,31 | 0,27561 |  | high risk:currentsmoker | 0,98 | 0,88 | 1,09 | 0,64378 |
|  | former smoker | 1,08 | 1,02 | 1,15 | 0,00642 |  | former smoker | 1,19 | 1,15 | 1,24 | 0,00001* |
|  | currentsmoker | 1,17 | 1,12 | 1,23 | 0,00001* |  | currentsmoker | 1,26 | 1,22 | 1,31 | 0,00001* |
| low | (Intercept) | 0,35 | 0,28 | 0,43 | 0,00001* | low | (Intercept) | 0,30 | 0,25 | 0,38 | 0,00001* |
| **(N = 51,648)** | agez | 0,95 | 0,93 | 0,97 | 0,00001* | **(N = 130,799)** | agez | 1,12 | 1,11 | 1,14 | 0,00001* |
|  | high risk | 1,01 | 0,90 | 1,13 | 0,92083 |  | high risk | 1,08 | 1,01 | 1,15 | 0,02920 |
|  | high risk:former smoker | 0,96 | 0,74 | 1,25 | 0,77674 |  | high risk:former smoker | 0,98 | 0,90 | 1,07 | 0,67496 |
|  | high risk:currentsmoker | 1,10 | 0,93 | 1,28 | 0,25967 |  | high risk:currentsmoker | 1,04 | 0,96 | 1,13 | 0,38540 |
|  | former smoker | 1,03 | 0,96 | 1,10 | 0,40663 |  | former smoker | 1,17 | 1,13 | 1,20 | 0,00001* |
|  | currentsmoker | 1,14 | 1,09 | 1,20 | 0,00001* |  | currentsmoker | 1,18 | 1,14 | 1,22 | 0,00001* |
| moderate | (Intercept) | 0,35 | 0,31 | 0,40 | 0,00001* | moderate | (Intercept) | 0,31 | 0,27 | 0,36 | 0,00001* |
| **(N = 81,789)** | agez | 0,97 | 0,95 | 0,98 | 0,00015* | **(N = 174,731)** | agez | 1,11 | 1,10 | 1,12 | 0,00001* |
|  | high risk | 1,13 | 1,02 | 1,26 | 0,01762 |  | high risk | 1,10 | 1,04 | 1,17 | 0,00213 |
|  | high risk:former smoker | 0,88 | 0,70 | 1,11 | 0,29379 |  | high risk:former smoker | 0,93 | 0,85 | 1,02 | 0,11166 |
|  | high risk:currentsmoker | 1,11 | 0,96 | 1,29 | 0,14848 |  | high risk:currentsmoker | 1,06 | 0,98 | 1,15 | 0,11749 |
|  | former smoker | 1,07 | 1,02 | 1,13 | 0,00699 |  | former smoker | 1,19 | 1,15 | 1,22 | 0,00001* |
| currentsmoker | 1,20 | 1,15 | 1,25 | 0,00001* |  | currentsmoker | 1,22 | 1,19 | 1,26 | 0,00001* |
| agez: z-standardized age | |  |  |  |  |  |  |  |  |  |  |
| SES: socioeconomic status | |  |  |  |  |  |  |  |  |  |  |
| lower: Lower Confidence Interval 95% | |  |  |  |  |  |  |  |  |  |  |
| upper: Upper Confidence Interval 95% | | |  |  |  |  |  |  |  |  |  |
| *Bonferroni correction= p=0.005/ 180 = 0.0002778 | | |  |  |  |  |  |  |  |  |  |
